# Supplementary material for: Differentially expressed genes reflect disease-induced rather than disease-causing changes in the transcriptome
Source: bioRxiv or medRxiv preprint supplement (doi:10.1101/2020.10.19.20213538), 2020-10-20
Supplement: Supplementary file [file media-1.pdf]

## **Supplementary Information**

**Differentially expressed genes reflect disease-induced rather than  
disease-causing changes in the transcriptome**

**Porcu et al.**

**Supplementary Figure 1. Comparison between revTWMR and PASCAL results. For each gene we compared the  $-\log_{10}(P\text{-value})$  calculated by revTWMR (x-axis) and PASCAL (y-axis).**

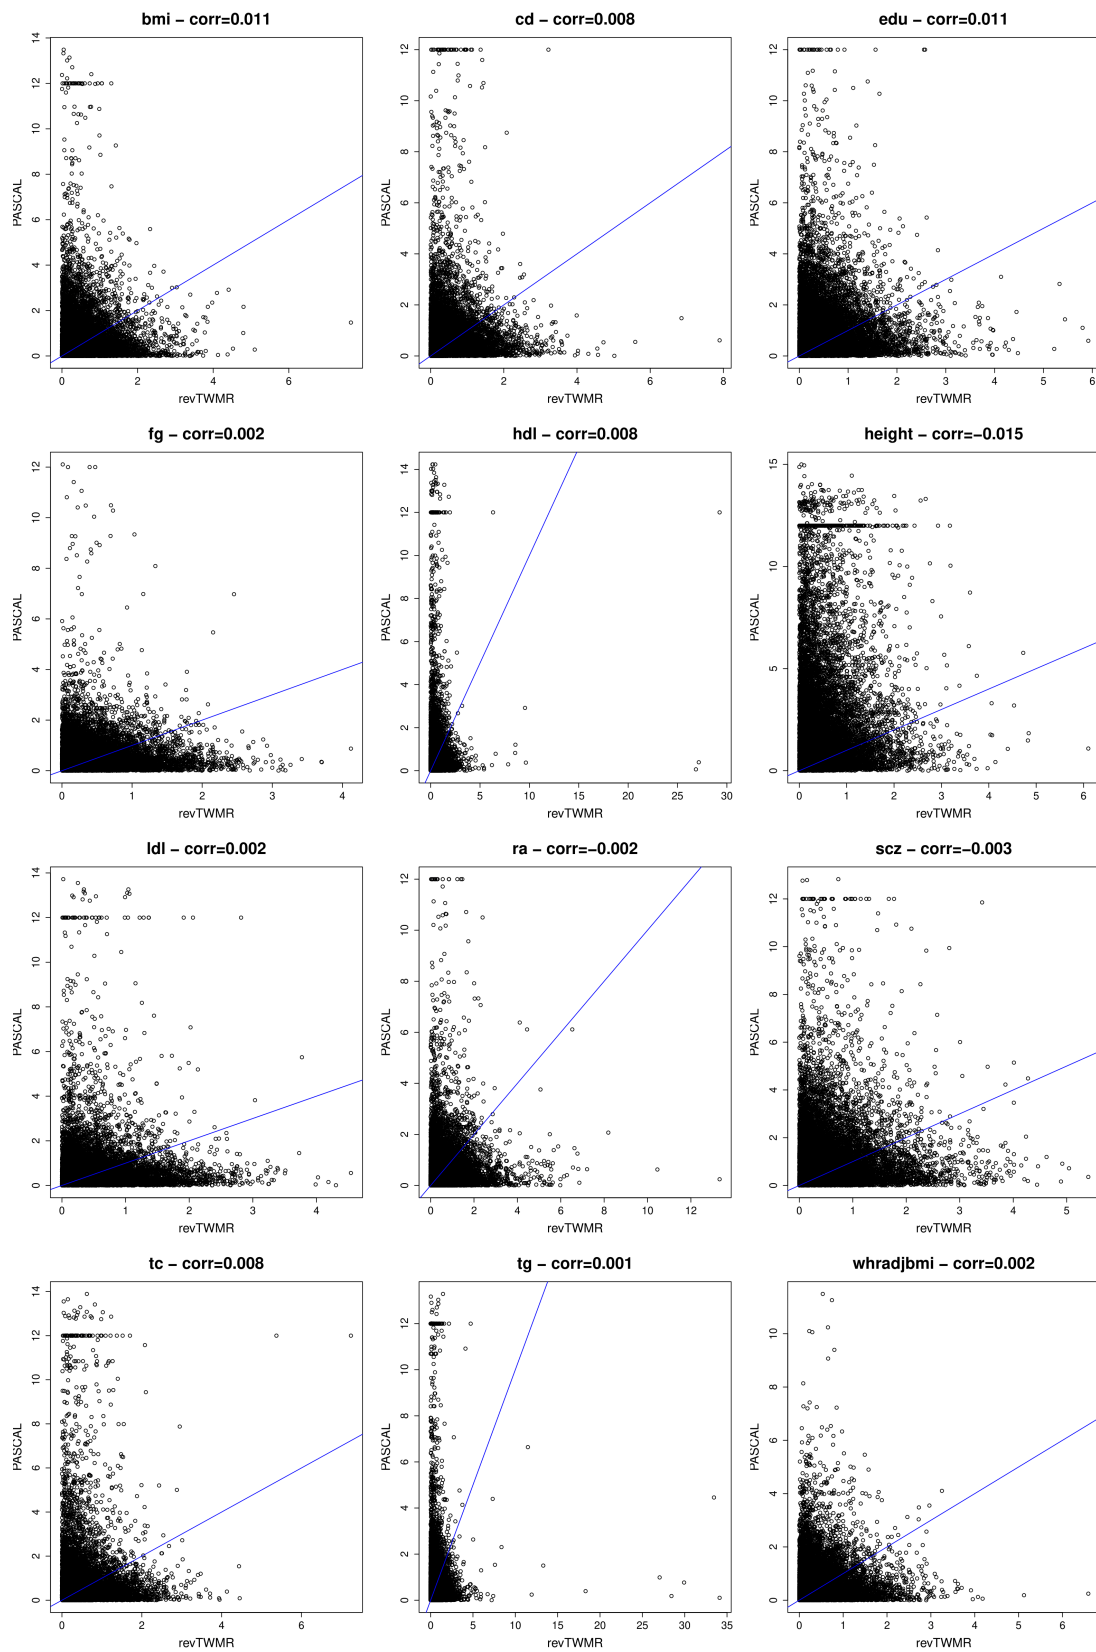

**Supplementary Figure 2. Pleiotropic SNP leads to biased association for STX1B.** For each SNP we plotted its effect on educational attainment (x-axis) and on the expression of STX1B (y-axis). The red and the green line represent the causal effect estimated by revTWMR before and after removing rs2456973 (red dot) respectively.

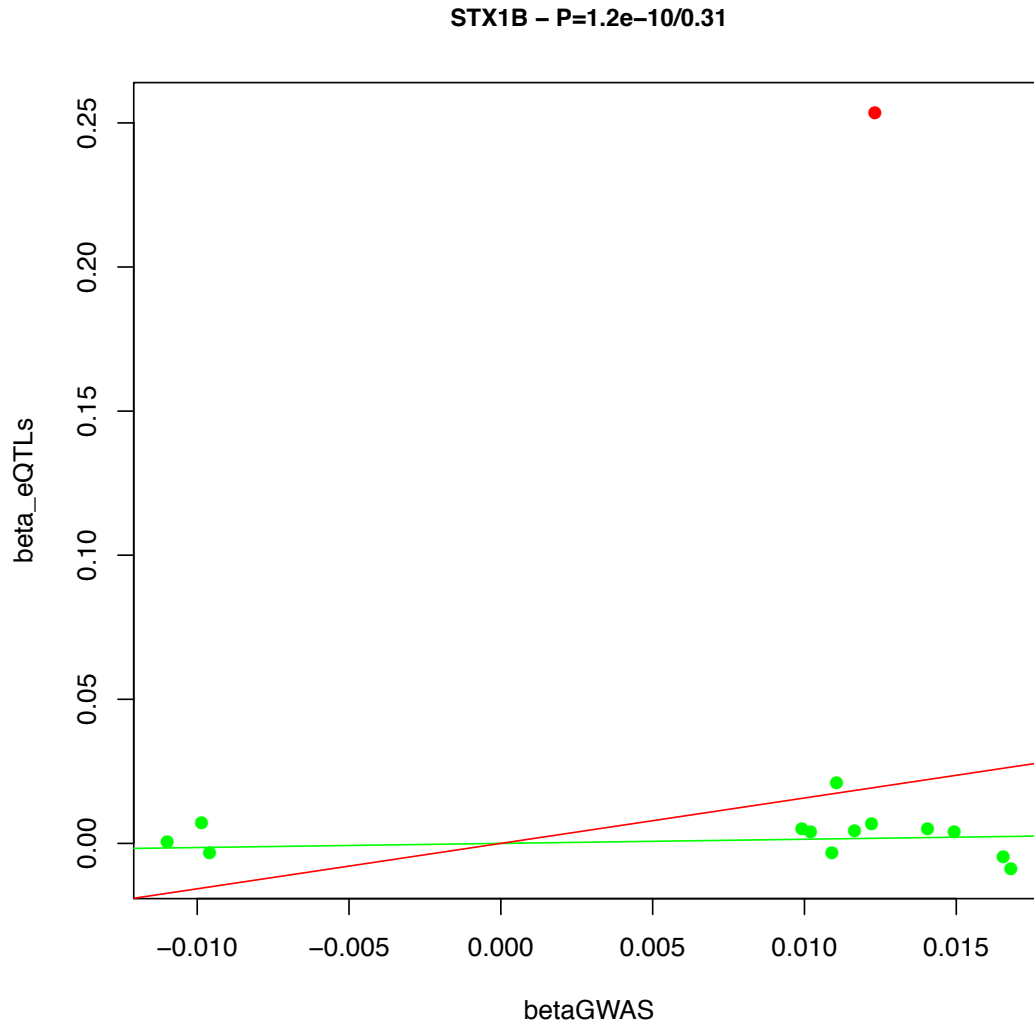

**Supplementary Figure 3. Linear relationship between the perturbation correlation ( $\hat{\rho}_P$ ) and the genetic correlation ( $\hat{\rho}_G$ ) obtained from LD Score Regression.** We selected the traits analyzed by our study and Bulik-Sullivan et al [1] and for each pair of traits we compared the two correlations. Gray dots represent non-significant trait pairs, blue dots represent trait pairs significant for both correlation and red and green ones correspond to pairs of traits significant only in  $\hat{\rho}_G$  or  $\hat{\rho}_P$ , respectively. The dotted line represents the regression line

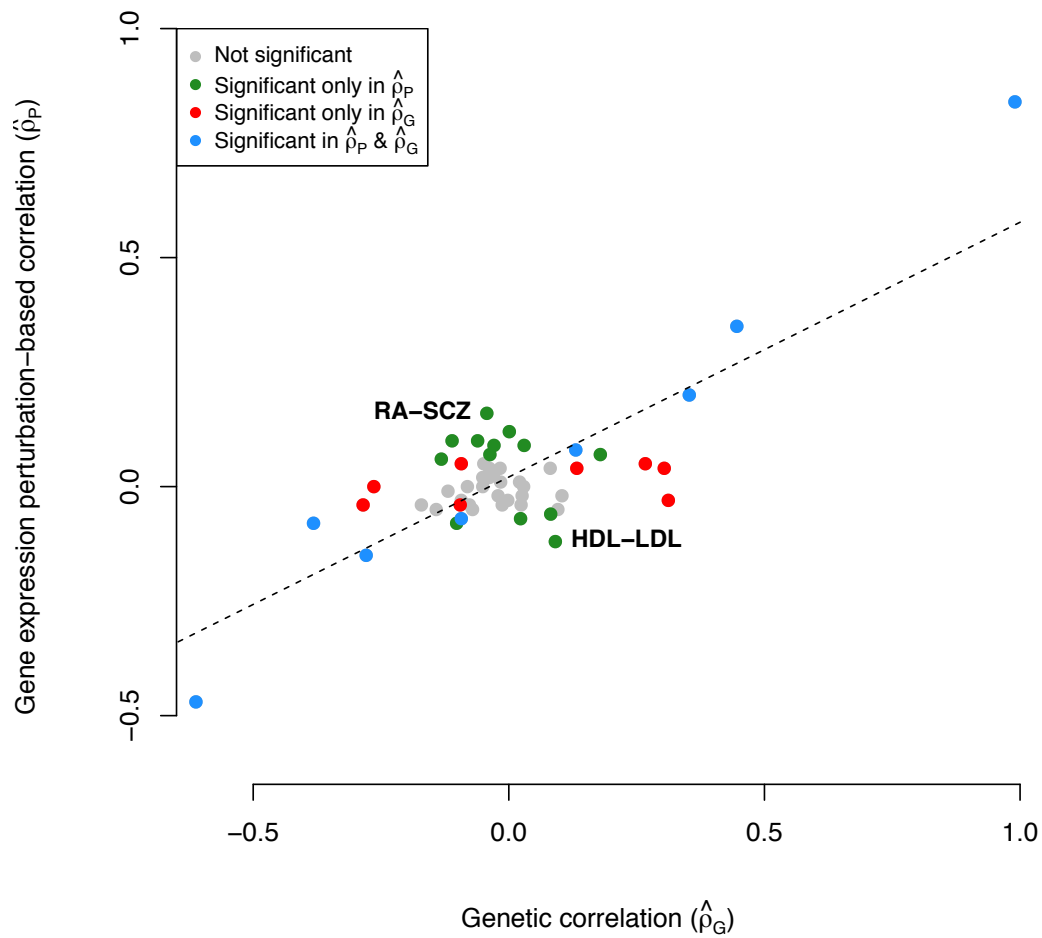

**Supplementary Figure 4. Correlation of DEG results for LDL in the three independent cohort. For each gene we compared its expression-trait correlation in two cohorts. The blue line represents the identity line.**

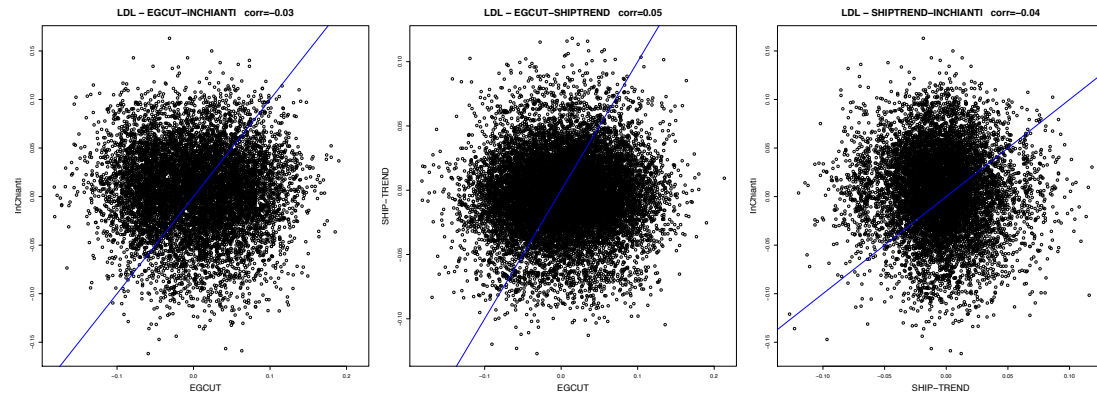

## References

1. Bulik-Sullivan, B., et al., *An atlas of genetic correlations across human diseases and traits.* Nat Genet, 2015. **47**(11): p. 1236-41.
